# Supplementary material for: Identifying gene locus associations with promyelocytic leukemia nuclear bodies using immuno-TRAP
Source: PubMed Central journal article supplement — J Cell Biol. 2013 Apr 15;201(2):325–35. doi: 10.1083/jcb.201211097 (PMC3628506; doi:10.1083/jcb.201211097), 2013-04-15
Supplement: supp_jcb.201211097_JCB_201211097_sm.pdf [file supp_jcb.201211097_JCB_201211097_sm.pdf]

Ching et al., <http://www.jcb.org/cgi/content/full/jcb.201211097/DC1>

Table S1. List of BACs and FOSMIDs used in this study

| BAC/FOSMID     | Assay                | Figure                                                   |
|----------------|----------------------|----------------------------------------------------------|
| <b>BACs</b>    |                      |                                                          |
| rp11-147K16    | Dot blot             | 1 D (spot 1)                                             |
| rp11-208J12    | Dot blot             | 1 D (spot 2)                                             |
| rp11-545O6     | Dot blot/immuno-FISH | 1 D (spot 3),<br>2 (A and G-I)                           |
| rp11-459C13    | Dot blot             | 1 D (spot 4)                                             |
| rp11-104O19    | Dot blot             | 1 D (spot 5)                                             |
| rp11-1038H1    | Dot blot             | 1 D (spot 6)                                             |
| rp11-81A22     | Dot blot             | 1 D (spot 7)                                             |
| rp11-4618      | Dot blot             | 1 D (spot 8)                                             |
| rp11-457I18    | Dot blot/immuno-FISH | 1 D (spot 9),<br>2 (B and G-I)                           |
| rp11-259C10    | Dot blot             | 1 D (spot 10)                                            |
| rp11-664D5     | Dot blot             | 1 D (spot 11)                                            |
| rp11-1149D22   | Dot blot             | 1 D (spot 12)                                            |
| rp11-1029O20   | Dot blot             | 1 D (spot 13)                                            |
| rp11-142B12    | Dot blot             | 1 D (spot 14)                                            |
| rp11-61B20     | Dot blot             | 1 D (spot 15)                                            |
| rp11-194H24    | Dot blot             | 1 D (spot 16)                                            |
| rp11-104H15    | Dot blot             | 1 D (spot 17)                                            |
| rp11-89D11     | Dot blot             | 1 D (spot 18)                                            |
| rp11-242A8     | Dot blot             | 1 D (spot 19)                                            |
| rp11-769H22    | Dot blot             | 1 D (spot 20)                                            |
| rp11-816B16    | Dot blot/immuno-FISH | 1 D (spot 21), 2 C                                       |
| rp11-166G23    | Dot blot             | 1 D (spot 22)                                            |
| rp11-746E23    | Dot blot             | 1 D (spot 23)                                            |
| rp11-299P2     | Dot blot/immuno-FISH | 1 D (spot 24), 2 E,<br>3 (A-C), 4 (C and D),<br>(spot 1) |
| rp11-10A19     | Dot blot             | 1 D (spot 25)                                            |
| rp11-185E17    | Dot blot/immuno-FISH | 1 D (spot 26), 2 D,<br>3 (A-C), 4 C                      |
| rp11-58E20     | Dot blot             | 1 D (spot 27)                                            |
| rp11-927K17    | Dot blot             | 4 D (spot 2)                                             |
| rp11-133K8     | Dot blot             | 4 D (spot 3)                                             |
| rp11-876I24    | Dot blot             | 4 D (spot 4)                                             |
| rp11-1031J4    | Dot blot             | 4 D (spot 5)                                             |
| rp11-100I7     | Dot blot             | 4 D (spot 6)                                             |
| rp11-79E15     | Immuno-FISH          | 5                                                        |
| rp11-81J17     | Immuno-FISH          | 5                                                        |
| rp11-181C9     | Immuno-FISH          | 5                                                        |
| rp11-297B9     | Immuno-FISH          | 5                                                        |
| rp11-64L12     | Immuno-FISH          | 5                                                        |
| rp11-93B14     | Immuno-FISH          | 5                                                        |
| rp11-118F19    | Immuno-FISH          | 5                                                        |
| rp11-138L23    | Immuno-FISH          | 5                                                        |
| rp11-44J5      | Immuno-FISH          | 5                                                        |
| rp11-64J19     | Immuno-FISH          | 5                                                        |
| rp11-978O17    | Immuno-FISH          | 5                                                        |
| <b>FOSMIDs</b> |                      |                                                          |
| WI2-2753N3     | Dot blot             | 1 F                                                      |
| WI2-732L6      | Dot blot             | 1 F                                                      |
| WI2-1477E2     | Dot blot             | 1 F                                                      |
| WI2-2806H13    | Dot blot             | 1 F                                                      |
| WI2-969B11     | Dot blot             | 1 F                                                      |
| WI2-1697F6     | Dot blot             | 1 F                                                      |

Table S2. List of genes found within peaks 1-3

| Peak | BAC         | Genes                              |
|------|-------------|------------------------------------|
| 1    | rp11-545O6  | ITGAE, GSG2, C17orf85, CAMKK1      |
| 2    | rp11-457I18 | RABEP1, NUP88, RPAIN, C1QBP, DHX33 |
| 3    | rp11-816B16 | ODF4, KRBA2, RPL26, NDEL1, MYH10   |

Table S3. Number of cells analyzed per FISH experiment

| Figure      | Cell line | No. of cells analyzed |
|-------------|-----------|-----------------------|
| 2 A         | Jurkat    | 33                    |
| 2 B         | Jurkat    | 36                    |
| 2 C         | Jurkat    | 30                    |
| 2 D         | Jurkat    | 40                    |
| 2 E         | Jurkat    | 30                    |
| 2 G         | Jurkat    | 36                    |
| 2 H         | Jurkat    | 36                    |
| 2 I         | Jurkat    | 36                    |
| 3 A         | GM05757   | 26                    |
| 3 B         | SK-N-SH   | 31                    |
| 3 C         | HT1080    | 39                    |
| 4 C         | GM05757   | 35                    |
| 5 (TFF1)    | Jurkat    | 30                    |
| 5 (SLCO4A1) | Jurkat    | 30                    |
| 5 (ABCA7)   | Jurkat    | 30                    |
| 5 (WDR90)   | Jurkat    | 30                    |
